# Supplementary material
Source: MDPI journal article supplement (https://www.mdpi.com/2073-4352/9/2/117)
Supplement: s1 [file s1]

## *Supplementary materials for*

### **Influence of selected saccharides on the precipitation of calcium-vaterite mixtures by the CO<sub>2</sub> bubbling method**

Donata Konopacka-Łyskawa, Natalia Czaplicka, Barbara Kościelska, Marcin Łapiński,  
Jacek Gębicki

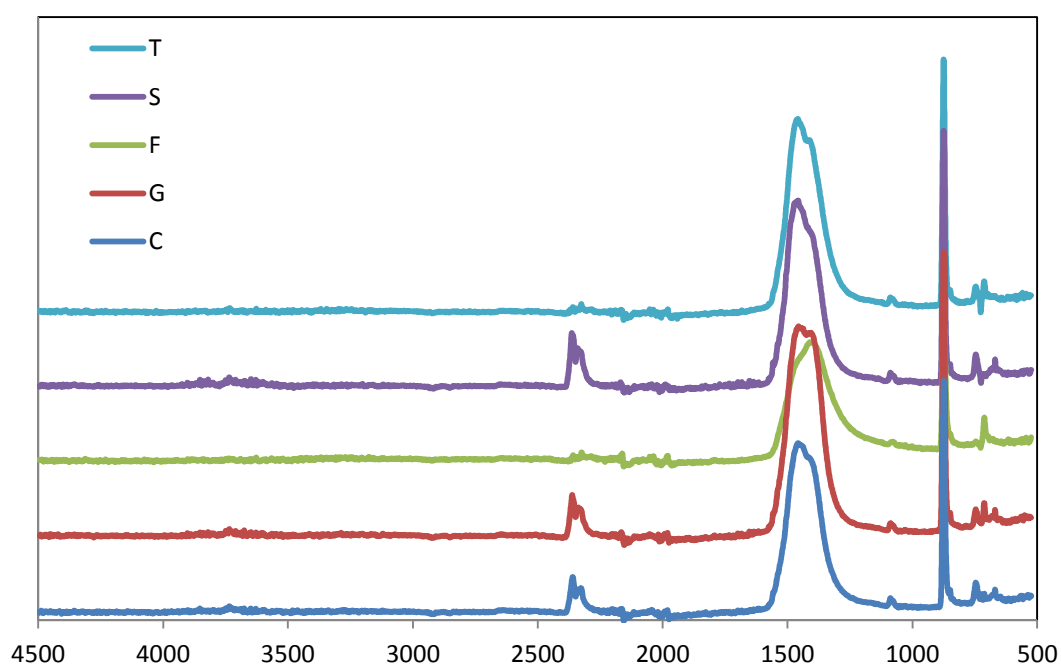

Figure S1. FTIR spectra of calcium carbonate precipitated without additives (C), with glucose (G), fructose (F), sucrose (S), and trehalose (T).

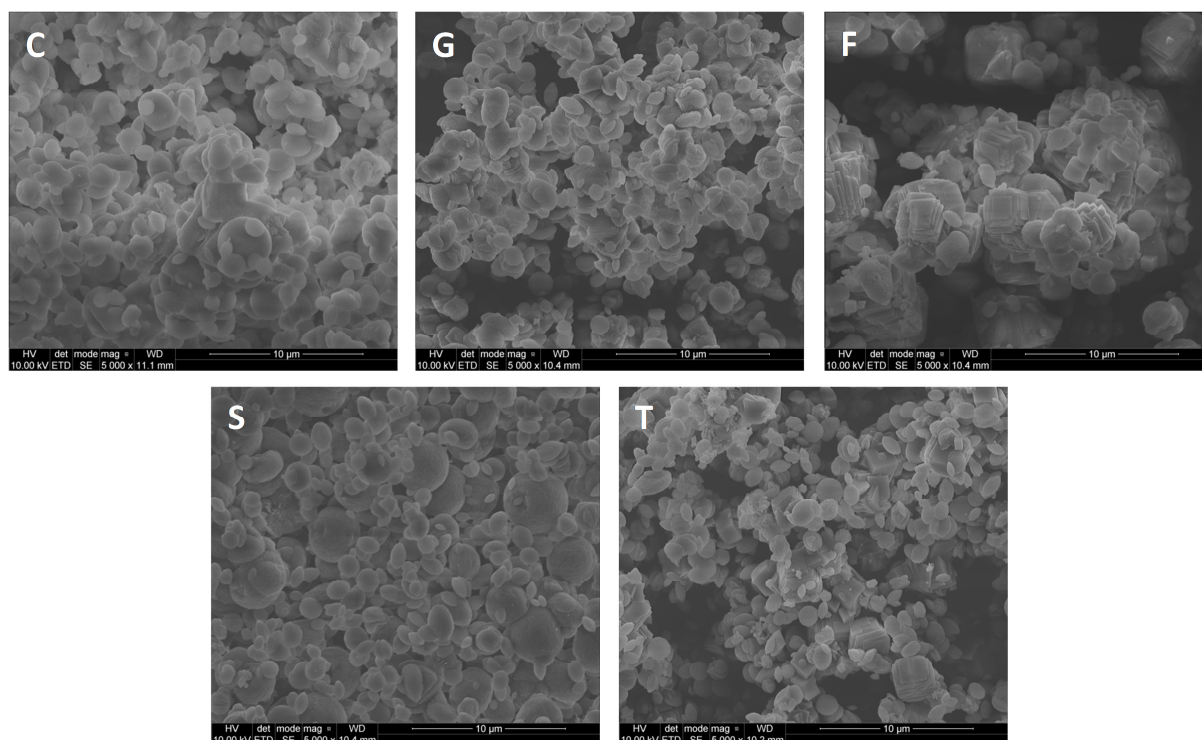

Figure S2. SEM images of calcium carbonate precipitated without additives (C), with glucose (G), fructose (F), sucrose (S), and trehalose (T).
